# Supplementary material for: The Role of Sugars in the Regulation of the Level of Endogenous Signaling Molecules during Defense Response of Yellow Lupine to Fusarium oxysporum
Source: PubMed Central journal article supplement (PMC7312090; doi:10.3390/ijms21114133), 2020-06-10
Supplement: ijms-21-04133-s001.pdf [file ijms-21-04133-s001.pdf]

**Table S1.** Statistical significance of differences between the average values of each pairs and Student's t-test for free salicylic acid content. Statistically significant differences (*p*-value) were assumed at *p* < 0.05.

| Time | Contrast | Value of contrast | Statistic <i>t</i> | <i>p</i> | Time | Value of contrast | Statistic <i>t</i> | <i>p</i> |
|------|----------|-------------------|--------------------|----------|------|-------------------|--------------------|----------|
| 0 h  | 0n: 0i   | 1.927             | 4.05               | 0.016    |      |                   |                    |          |
| 24 h | +Sn: +Si | -5.490            | -6.22              | 0.003    | 72 h | -10.19            | -20.63             | < 0.001  |
|      | +Gn:+Gi  | -44.05            | -46.40             | < 0.001  |      | -4.173            | -3.19              | 0.081    |
|      | +Fn: +Fi | 21.92             | 5.32               | 0.006    |      | 3.822             | 3.89               | 0.018    |
|      | -Sn: -Si | -2.037            | -3.87              | 0.018    |      | 8.880             | 3.14               | 0.035    |
|      | +Si: -Si | 1.763             | 2.05               | 0.110    |      | 9.100             | 11.93              | < 0.001  |
|      | +Gi: -Si | 42.57             | 42.76              | 0.001    |      | 5.293             | 3.60               | 0.023    |
|      | +Fi: -Si | -2.780            | 3.11               | 0.036    |      | 0.3193            | 0.34               | 0.748    |
| 48 h | +Sn: +Si | -44.82            | -27.27             | < 0.001  | 96 h | -1.867            | -1.08              | 0.388    |
|      | +Gn:+Gi  | -20.16            | -8.08              | 0.001    |      | 4.412             | 1.54               | 0.199    |
|      | +Fn: +Fi | 3.02              | 2.41               | 0.073    |      | 3.251             | 2.26               | 0.086    |
|      | -Sn: -Si | -3.273            | -4.19              | 0.014    |      | 0.4647            | 0.26               | 0.816    |
|      | +Si: -Si | 34.74             | 20.84              | < 0.001  |      | -0.0930           | -0.05              | 0.962    |
|      | +Gi: -Si | 14.28             | 5.77               | 0.004    |      | 1.548             | 0.74               | 0.536    |
|      | +Fi: -Si | -3.419            | -4.56              | 0.010    |      | 0.4037            | 0.38               | 0.724    |

**Table S2.** Statistical significance of differences between the average values of each pairs and Student's t-test for glucoside salicylic acid content. Statistically significant differences (*p*-value) were assumed at *p* < 0.05.

| Time | Contrast | Value of contrast | Statistic <i>t</i> | <i>p</i> | Time | Value of contrast | Statistic <i>t</i> | <i>p</i> |
|------|----------|-------------------|--------------------|----------|------|-------------------|--------------------|----------|
| 0 h  | 0n: 0i   | -12.29            | -2.68              | 0.055    |      |                   |                    |          |
| 24 h | +Sn: +Si | 8.694             | 3.43               | 0.027    | 72 h | 7.200             | 5.08               | 0.034    |
|      | +Gn:+Gi  | 4.104             | 1.74               | 0.157    |      | -16.82            | -6.44              | 0.003    |
|      | +Fn: +Fi | 4.534             | 2.16               | 0.097    |      | -39.17            | -8.75              | < 0.001  |
|      | -Sn: -Si | 7.407             | 1.78               | 0.150    |      | -29.07            | -9.86              | < 0.001  |
|      | +Si: -Si | -2.407            | -0.56              | 0.606    |      | -34.75            | -11.67             | < 0.001  |
|      | +Gi: -Si | -2.140            | -0.54              | 0.620    |      | -28.63            | -8.11              | 0.001    |
|      | +Fi: -Si | -5.923            | -1.55              | 0.195    |      | -5.478            | -1.08              | 0.342    |
| 48 h | +Sn: +Si | -63.03            | -21.33             | < 0.001  | 96 h | 4.552             | 1.21               | 0.346    |
|      | +Gn:+Gi  | -67.24            | -18.47             | < 0.001  |      | -25.32            | -9.94              | < 0.001  |
|      | +Fn: +Fi | -13.39            | -2.04              | 0.110    |      | -8.094            | -10.05             | < 0.001  |
|      | -Sn: -Si | -39.68            | -7.69              | 0.002    |      | -11.60            | -9.23              | < 0.001  |
|      | +Si: -Si | 12.18             | 2.88               | 0.045    |      | -2.37             | -2.65              | 0.057    |
|      | +Gi: -Si | 27.78             | 6.96               | 0.002    |      | 15.70             | 15.18              | < 0.001  |
|      | +Fi: -Si | 8.369             | 1.23               | 0.285    |      | -14.56            | -13.26             | < 0.001  |

**Table S3.** Statistical significance of differences between the average values of each pairs and Student's t-test for total salicylic acid content. Statistically significant differences (*p*-value) were assumed at  $p < 0.05$ .

| Time        | Contrast | Value of contrast | Statistic <i>t</i> | <i>p</i> | Time        | Value of contrast | Statistic <i>t</i> | <i>p</i> |
|-------------|----------|-------------------|--------------------|----------|-------------|-------------------|--------------------|----------|
| <b>0 h</b>  | 0n: 0i   | -10.07            | -2.11              | 0.103    |             |                   |                    |          |
| <b>24 h</b> | +Sn: +Si | 3.202             | 1.40               | 0.235    | <b>72 h</b> | -3.109            | -2.66              | 0.057    |
|             | +Gn:+Gi  | -39.88            | -17.35             | < 0.001  |             | -21.03            | -5.46              | 0.005    |
|             | +Fn: +Fi | 24.79             | 6.21               | 0.025    |             | -35.35            | -9.41              | 0.011    |
|             | -Sn: -Si | 5.407             | 1.47               | 0.215    |             | -19.59            | -4.25              | 0.013    |
|             | +Si: -Si | -0.6410           | -0.18              | 0.868    |             | -25.65            | -11.46             | < 0.001  |
|             | +Gi: -Si | 40.33             | 10.82              | < 0.001  |             | -23.31            | -5.61              | 0.005    |
|             | +Fi: -Si | -8.703            | -2.58              | 0.122    |             | -5.157            | -1.22              | 0.289    |
| <b>48 h</b> | +Sn: +Si | -107.9            | -24.04             | < 0.001  | <b>96 h</b> | 2.684             | 0.66               | 0.544    |
|             | +Gn:+Gi  | -87.40            | -31.15             | < 0.001  |             | -20.91            | -8.03              | 0.001    |
|             | +Fn: +Fi | -9.723            | -1.44              | 0.223    |             | -4.961            | -3.90              | 0.018    |
|             | -Sn: -Si | -42.99            | -7.28              | 0.002    |             | -11.13            | -4.03              | 0.016    |
|             | +Si: -Si | 46.92             | 8.36               | 0.001    |             | -2.498            | -1.13              | 0.323    |
|             | +Gi: -Si | 42.07             | 10.03              | < 0.001  |             | 17.25             | 6.58               | 0.003    |
|             | +Fi: -Si | 4.615             | 0.70               | 0.524    |             | -14.15            | -20.81             | 0.001    |

**Table S4.** Statistical significance of differences between the average values of each pairs and Student's t-test for total abscisic acid content. Statistically significant differences (*p*-value) were assumed at  $p < 0.05$ .

| Time        | Contrast | Value of contrast | Statistic <i>t</i> | <i>p</i> | Time        | Value of contrast | Statistic <i>t</i> | <i>p</i> |
|-------------|----------|-------------------|--------------------|----------|-------------|-------------------|--------------------|----------|
| <b>0 h</b>  | 0n: 0i   | 1.990             | 1.01               | 0.371    |             |                   |                    |          |
| <b>24 h</b> | +Sn: +Si | -2.947            | -0.61              | 0.576    | <b>72 h</b> | -46.36            | -11.98             | < 0.001  |
|             | +Gn:+Gi  | -31.03            | -3.53              | 0.024    |             | -48.66            | -5.53              | 0.005    |
|             | +Fn: +Fi | -63.48            | -10.02             | < 0.001  |             | -61.72            | -8.74              | < 0.001  |
|             | -Sn: -Si | -7.29             | -1.40              | 0.235    |             | 2.707             | 0.85               | 0.445    |
|             | +Si: -Si | 13.50             | 2.89               | 0.045    |             | 83.29             | 17.19              | < 0.001  |
|             | +Gi: -Si | 37.76             | 5.16               | 0.007    |             | 101.2             | 16.09              | < 0.001  |
|             | +Fi: -Si | 82.40             | 12.17              | 0.001    |             | 70.75             | 10.07              | < 0.001  |
| <b>48 h</b> | +Sn: +Si | -50.46            | -5.47              | 0.005    | <b>96 h</b> | -27.38            | -2.71              | 0.054    |
|             | +Gn:+Gi  | -27.16            | -5.45              | 0.006    |             | -39.24            | -4.16              | 0.014    |
|             | +Fn: +Fi | -36.42            | -9.12              | < 0.001  |             | -18.61            | -3.05              | 0.038    |
|             | -Sn: -Si | -12.60            | -3.92              | 0.017    |             | 8.033             | 0.88               | 0.429    |
|             | +Si: -Si | 63.92             | 17.00              | < 0.001  |             | 71.55             | 11.97              | < 0.001  |
|             | +Gi: -Si | 35.56             | 8.18               | 0.001    |             | 86.32             | 8.21               | 0.001    |
|             | +Fi: -Si | 52.58             | 21.26              | < 0.001  |             | 77.63             | 12.35              | < 0.001  |

**Table S5.** Statistical significance of differences between the average values of each pairs and Student's t-test for ethylene content. Statistically significant differences (*p*-value) were assumed at  $p < 0.05$ .

| Time        | Contrast | Value of contrast | Statistic <i>t</i> | <i>p</i> | Time        | Value of contrast | Statistic <i>t</i> | <i>p</i> |
|-------------|----------|-------------------|--------------------|----------|-------------|-------------------|--------------------|----------|
| <b>0 h</b>  | 0n: 0i   | -5.090            | -1.59              | 0.186    |             |                   |                    |          |
| <b>24 h</b> | +Sn: +Si | 12.96             | 9.33               | 0.011    | <b>72 h</b> | 0.0267            | 0.01               | 0.995    |
|             | +Gn:+Gi  | 1.410             | 0.040              | 0.712    |             | 12.73             | 10.27              | < 0.001  |
|             | +Fn: +Fi | 7.260             | 3.03               | 0.039    |             | 3.380             | 1.27               | 0.274    |
|             | -Sn: -Si | 8.580             | 4.34               | 0.012    |             | -1.963            | -2.57              | 0.062    |
|             | +Si: -Si | 6.857             | 11.75              | 0.007    |             | 13.88             | 4.71               | 0.009    |
|             | +Gi: -Si | 18.09             | 17.97              | < 0.001  |             | 6.827             | 5.16               | 0.007    |
|             | +Fi: -Si | 7.543             | 10.05              | < 0.001  |             | 10.09             | 4.40               | 0.012    |
| <b>48 h</b> | +Sn: +Si | -1.643            | -0.42              | 0.695    | <b>96 h</b> | 1.790             | 0.76               | 0.488    |
|             | +Gn:+Gi  | 7.053             | 1.89               | 0.132    |             | -8.687            | -4.06              | 0.015    |
|             | +Fn: +Fi | 2.383             | 1.15               | 0.315    |             | -6.040            | -2.62              | 0.119    |
|             | -Sn: -Si | 1.180             | 0.64               | 0.558    |             | -5.253            | -3.70              | 0.021    |
|             | +Si: -Si | 15.14             | 4.08               | 0.015    |             | 7.373             | 3.28               | 0.031    |
|             | +Gi: -Si | 12.02             | 3.91               | 0.017    |             | 11.26             | 7.31               | 0.002    |
|             | +Fi: -Si | 20.71             | 10.84              | < 0.001  |             | 8.497             | 3.35               | 0.029    |

**Table S6.** Statistical significance of differences between the average values of each pairs and Student's t-test for hydrogen peroxide content. Statistically significant differences (*p*-value) were assumed at  $p < 0.05$ .

| Time        | Contrast | Value of contrast | Statistic <i>t</i> | <i>p</i> | Time        | Value of contrast | Statistic <i>t</i> | <i>p</i> |
|-------------|----------|-------------------|--------------------|----------|-------------|-------------------|--------------------|----------|
| <b>0 h</b>  | 0n: 0i   | -15.96            | -4.29              | 0.013    |             |                   |                    |          |
| <b>24 h</b> | +Sn: +Si | 8.190             | 1.83               | 0.142    | <b>72 h</b> | -218.5            | -38.52             | < 0.001  |
|             | +Gn:+Gi  | -23.96            | -8.53              | 0.001    |             | -130.2            | -22.48             | < 0.001  |
|             | +Fn: +Fi | -31.00            | -12.17             | < 0.001  |             | -102.1            | -28.07             | < 0.001  |
|             | -Sn: -Si | -3.593            | -1.52              | 0.203    |             | -43.69            | -5.31              | 0.006    |
|             | +Si: -Si | -88.53            | -36.92             | < 0.001  |             | 7.350             | 0.85               | 0.443    |
|             | +Gi: -Si | -17.69            | -6.31              | 0.003    |             | -31.45            | -3.89              | 0.018    |
|             | +Fi: -Si | -12.69            | -7.64              | 0.002    |             | -29.23            | -3.93              | 0.057    |
| <b>48 h</b> | +Sn: +Si | -27.72            | -10.84             | < 0.001  | <b>96 h</b> | -97.67            | -17.37             | < 0.001  |
|             | +Gn:+Gi  | -82.41            | -31.78             | < 0.001  |             | -77.41            | -8.87              | < 0.001  |
|             | +Fn: +Fi | -77.45            | -34.05             | < 0.001  |             | -86.58            | -22.66             | < 0.001  |
|             | -Sn: -Si | 11.10             | 2.95               | 0.042    |             | -65.80            | -8.74              | < 0.001  |
|             | +Si: -Si | -54.09            | -15.10             | < 0.001  |             | -88.88            | -11.25             | < 0.001  |
|             | +Gi: -Si | 4.880             | 1.25               | 0.281    |             | -54.25            | -5.18              | 0.007    |
|             | +Fi: -Si | 6.617             | 1.69               | 0.166    |             | -20.71            | -2.71              | 0.054    |

**Table S7.** Statistical significance of differences between the average values of each pairs and Student's t-test for phenylalanine ammonia-lyase activity. Statistically significant differences (*p*-value) were assumed at  $p < 0.05$ .

| Time        | Contrast | Value of contrast | Statistic <i>t</i> | <i>p</i> | Time        | Value of contrast | Statistic <i>t</i> | <i>p</i> |
|-------------|----------|-------------------|--------------------|----------|-------------|-------------------|--------------------|----------|
| <b>0 h</b>  | 0n: 0i   | -0.2500           | -3.02              | 0.039    |             |                   |                    |          |
| <b>24 h</b> | +Sn: +Si | 2.897             | 22.23              | < 0.001  | <b>72 h</b> | 2.680             | 1.84               | 0.140    |
|             | +Gn:+Gi  | -3.067            | -4.78              | 0.009    |             | -1.713            | -5.97              | 0.004    |
|             | +Fn: +Fi | -3.943            | -8.88              | < 0.001  |             | -5.783            | -6.40              | 0.003    |
|             | -Sn: -Si | -4.293            | -9.49              | < 0.001  |             | -1.477            | -2.70              | 0.054    |
|             | +Si: -Si | -4.847            | -20.66             | < 0.001  |             | 13.25             | 16.90              | < 0.001  |
|             | +Gi: -Si | 7.183             | 15.26              | < 0.001  |             | 9.350             | 16.90              | < 0.001  |
|             | +Fi: -Si | 6.073             | 13.43              | < 0.001  |             | 9.003             | 9.09               | < 0.001  |
| <b>48 h</b> | +Sn: +Si | 6.900             | -23.17             | < 0.001  | <b>96 h</b> | -9.930            | -10.42             | < 0.001  |
|             | +Gn:+Gi  | -13.23            | -21.24             | < 0.001  |             | -4.150            | -10.11             | 0.008    |
|             | +Fn: +Fi | -6.480            | -5.02              | 0.007    |             | -2.237            | -1.78              | 0.149    |
|             | -Sn: -Si | -4.973            | -9.92              | 0.009    |             | -0.4930           | -8.94              | < 0.001  |
|             | +Si: -Si | 7.187             | 12.85              | < 0.001  |             | 29.89             | 32.93              | < 0.001  |
|             | +Gi: -Si | 12.53             | 16.82              | < 0.001  |             | 11.15             | 144.97             | < 0.001  |
|             | +Fi: -Si | 9.270             | 9.19               | < 0.001  |             | 6.948             | 5.71               | 0.029    |

**Table S8.** Statistical significance of differences between the average values of each pairs and Student's t-test for benzoic acid 2-hydroxylase activity. Statistically significant differences (*p*-value) were assumed at  $p < 0.05$ .

| Time        | Contrast | Value of contrast | Statistic <i>t</i> | <i>p</i> | Time        | Value of contrast | Statistic <i>t</i> | <i>p</i> |
|-------------|----------|-------------------|--------------------|----------|-------------|-------------------|--------------------|----------|
| <b>0 h</b>  | 0n: 0i   | -0.01401          | -1.75              | 0.156    |             |                   |                    |          |
| <b>24 h</b> | +Sn: +Si | 0.02437           | 4.03               | 0.016    | <b>72 h</b> | -0.08344          | -2.98              | 0.041    |
|             | +Gn:+Gi  | 0.01978           | 1.66               | 0.172    |             | -0.2048           | -5.45              | 0.006    |
|             | +Fn: +Fi | 0.01260           | 2.07               | 0.107    |             | -0.2779           | -21.59             | < 0.001  |
|             | -Sn: -Si | -0.01213          | -0.96              | 0.391    |             | -0.3328           | -14.45             | < 0.001  |
|             | +Si: -Si | -0.06311          | -5.88              | 0.025    |             | -0.4574           | -52.89             | < 0.001  |
|             | +Gi: -Si | -0.06801          | -6.30              | 0.030    |             | -0.4421           | -15.15             | < 0.001  |
|             | +Fi: -Si | -0.05652          | -4.76              | 0.009    |             | -0.2848           | -29.74             | < 0.001  |
| <b>48 h</b> | +Sn: +Si | 0.08134           | 6.29               | 0.003    | <b>96 h</b> | 0.2797            | 8.31               | 0.001    |
|             | +Gn:+Gi  | 0.06576           | 5.18               | 0.007    |             | -0.2271           | -4.82              | 0.009    |
|             | +Fn: +Fi | 0.01886           | 1.01               | 0.370    |             | -0.5867           | -15.26             | < 0.001  |
|             | -Sn: -Si | -0.01778          | -0.87              | 0.435    |             | 0.3612            | 5.39               | 0.030    |
|             | +Si: -Si | -0.03097          | -1.63              | 0.179    |             | -0.4546           | -13.55             | < 0.001  |
|             | +Gi: -Si | -0.1291           | -0.62              | 0.567    |             | 0.2696            | 6.00               | 0.004    |
|             | +Fi: -Si | -0.01197          | -0.68              | 0.531    |             | 0.5732            | 14.09              | < 0.001  |

**Table S9.** Statistical significance of differences between the average values of each pairs and Student's t-test for superoxide dismutase activity. Statistically significant differences (*p*-value) were assumed at  $p < 0.05$ .

| Time        | Contrast | Value of contrast | Statistic <i>t</i> | <i>p</i> | Time        | Value of contrast | Statistic <i>t</i> | <i>p</i> |
|-------------|----------|-------------------|--------------------|----------|-------------|-------------------|--------------------|----------|
| <b>0 h</b>  | On: Oi   | -0.2756           | -0.31              | 0.766    |             |                   |                    |          |
| <b>24 h</b> | +Sn: +Si | 0.7278            | 1.27               | 0.251    | <b>72 h</b> | 4.362             | 2.75               | 0.033    |
|             | +Gn:+Gi  | 0.7415            | 2.47               | 0.049    |             | 5.617             | 4.59               | 0.004    |
|             | +Fn: +Fi | 1.005             | 3.90               | 0.008    |             | 4.350             | 1.32               | 0.235    |
|             | -Sn: -Si | 0.3569            | 2.08               | 0.083    |             | 4.161             | 1.89               | 0.107    |
|             | +Si: -Si | 0.0652            | 0.27               | 0.793    |             | 1.420             | 0.71               | 0.501    |
|             | +Gi: -Si | 0.5912            | 2.26               | 0.065    |             | 0.0403            | 0.02               | 0.982    |
|             | +Fi: -Si | -0.0552           | -0.22              | 0.835    |             | 0.2741            | 0.10               | 0.921    |
| <b>48 h</b> | +Sn: +Si | 3.614             | 2.30               | 0.099    | <b>96 h</b> | 12.26             | 5.57               | 0.009    |
|             | +Gn:+Gi  | 2.119             | 0.87               | 0.416    |             | 2.449             | 2.24               | 0.110    |
|             | +Fn: +Fi | 0.3018            | 0.17               | 0.868    |             | 9.412             | 2.45               | 0.050    |
|             | -Sn: -Si | 0.6199            | 0.31               | 0.770    |             | -6.583            | -6.40              | < 0.001  |
|             | +Si: -Si | -0.5996           | -0.33              | 0.755    |             | -0.7844           | -0.79              | 0.458    |
|             | +Gi: -Si | 0.4106            | 0.21               | 0.837    |             | 2.915             | 2.11               | 0.080    |
|             | +Fi: -Si | -0.4888           | -0.42              | 0.690    |             | -1.089            | -0.44              | 0.672    |
